# Supplementary material
Source: PubMed Central journal article supplement (PMC4560948)
Supplement: supp_nsv014_scan-14-381-File007.pdf [file supp_nsv014_scan-14-381-File007.pdf]

### Supplementary Figure Legends

Supplementary Figure 1. *Scatterplots of BOLD signal associations with DHEA in males and females for happy > calm (a-e), fear > calm (f-l), and angry > calm (m-p).*

a)

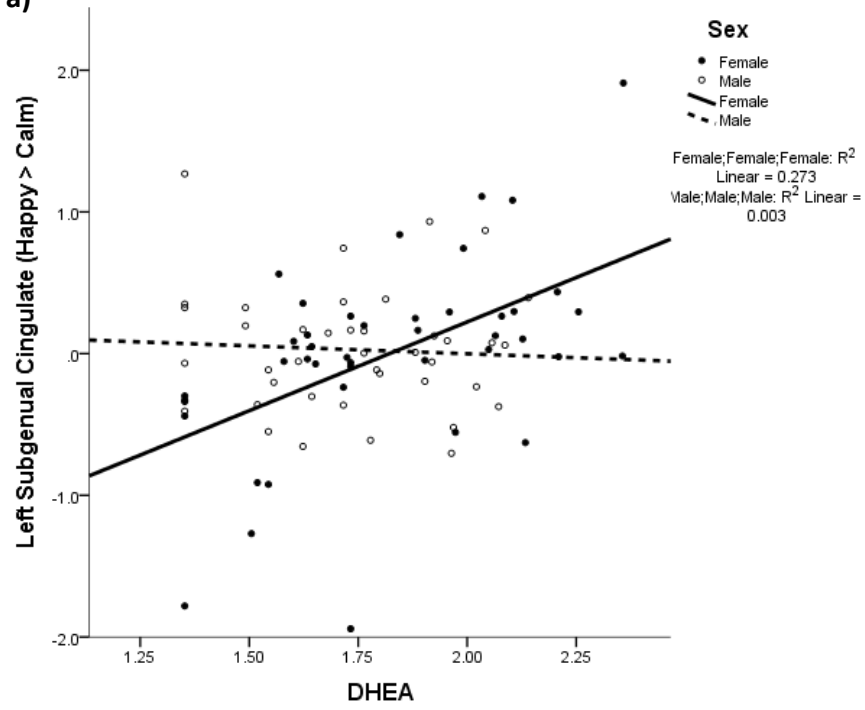

b)

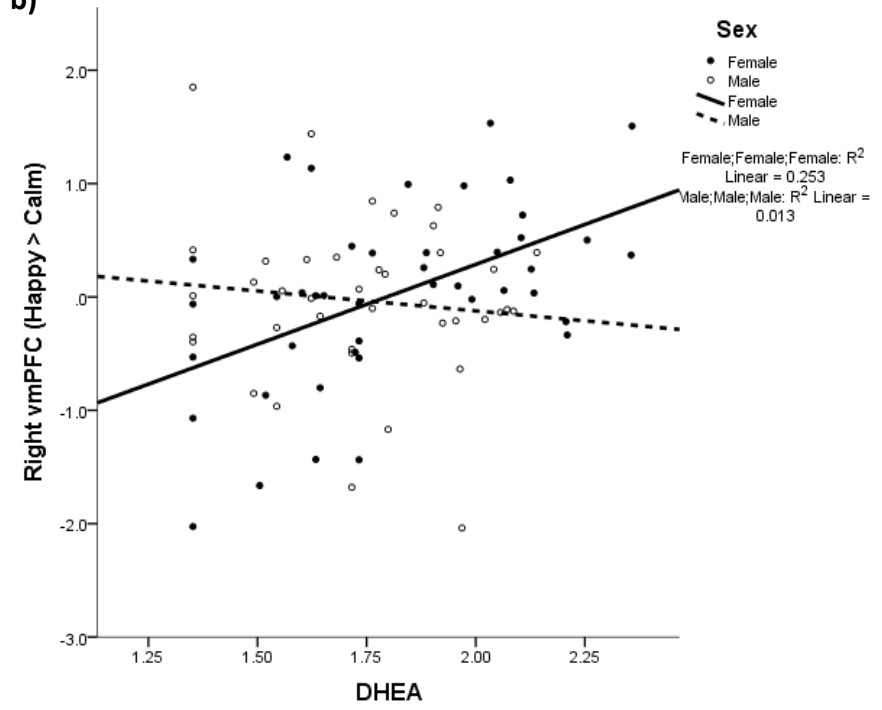

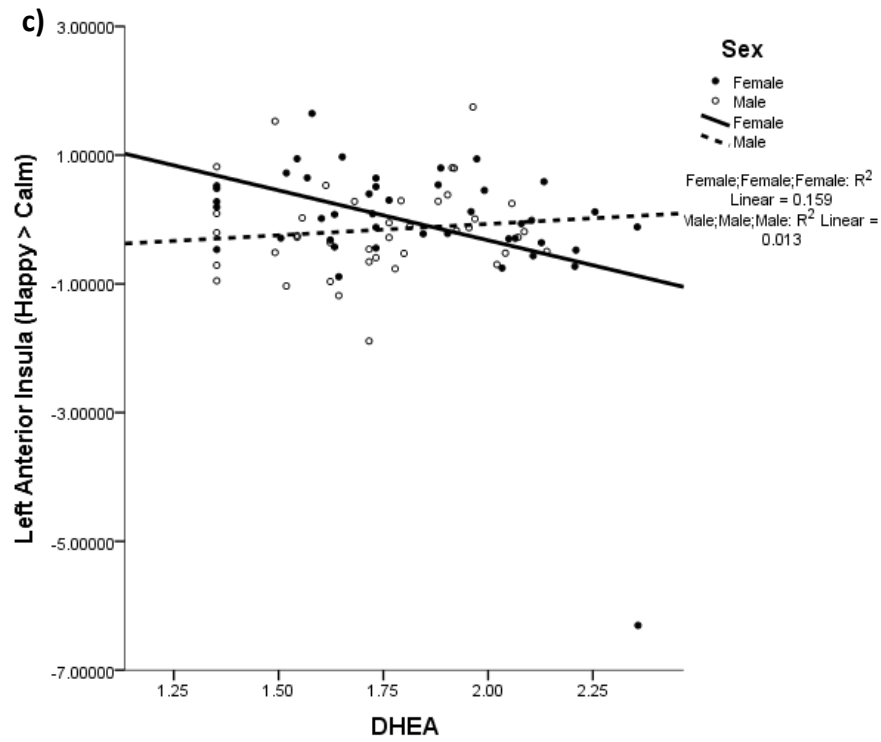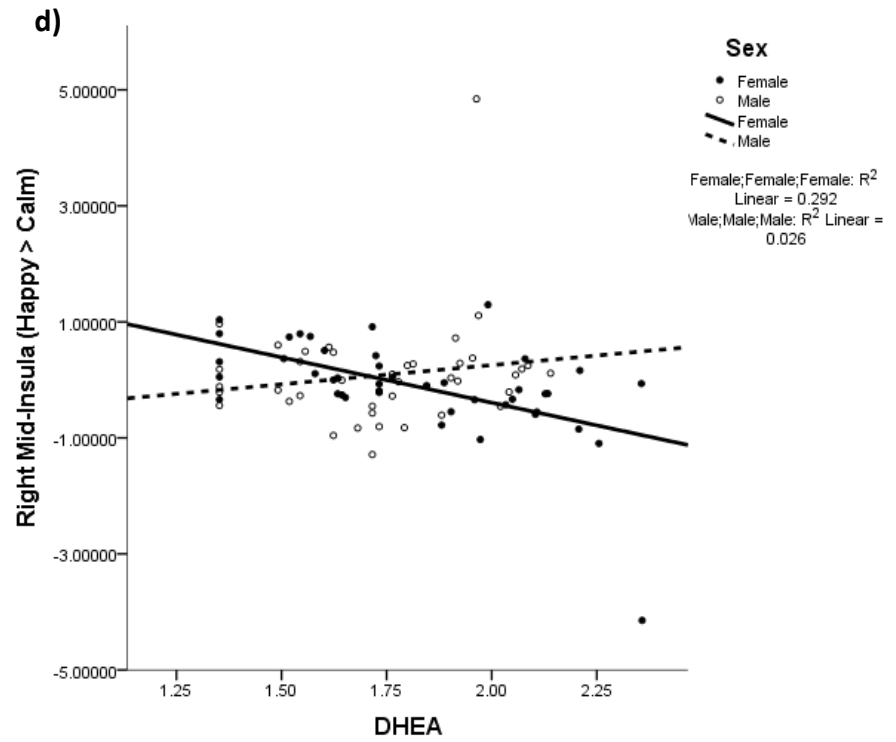

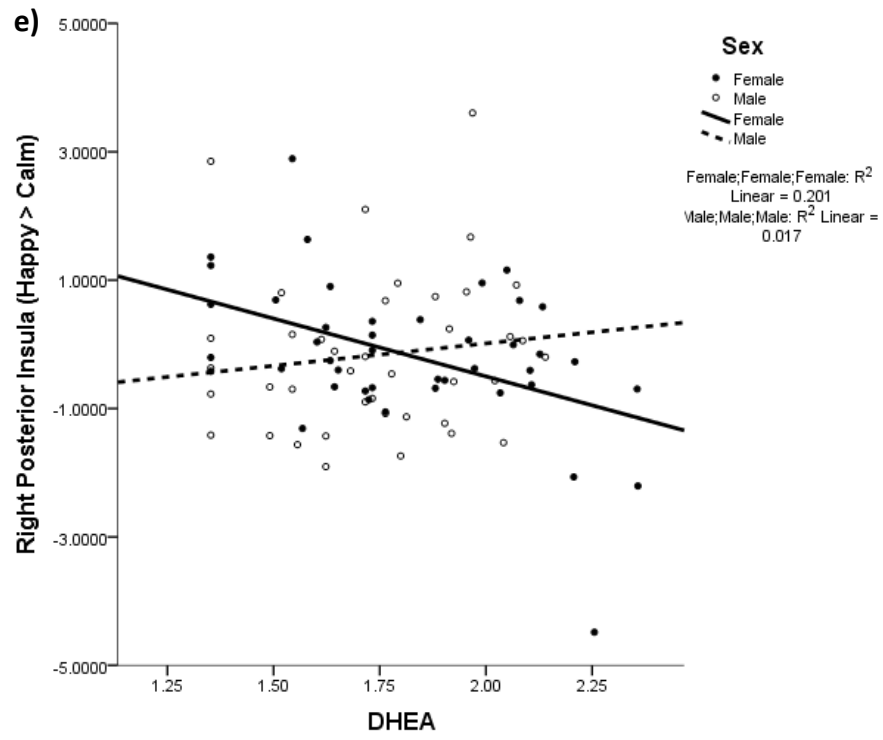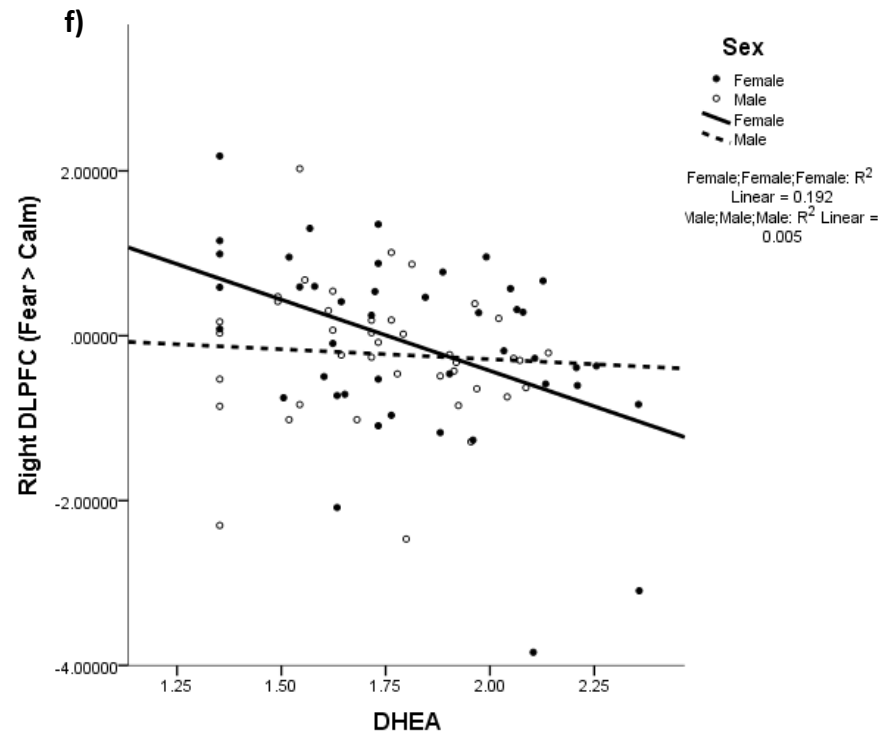

g)

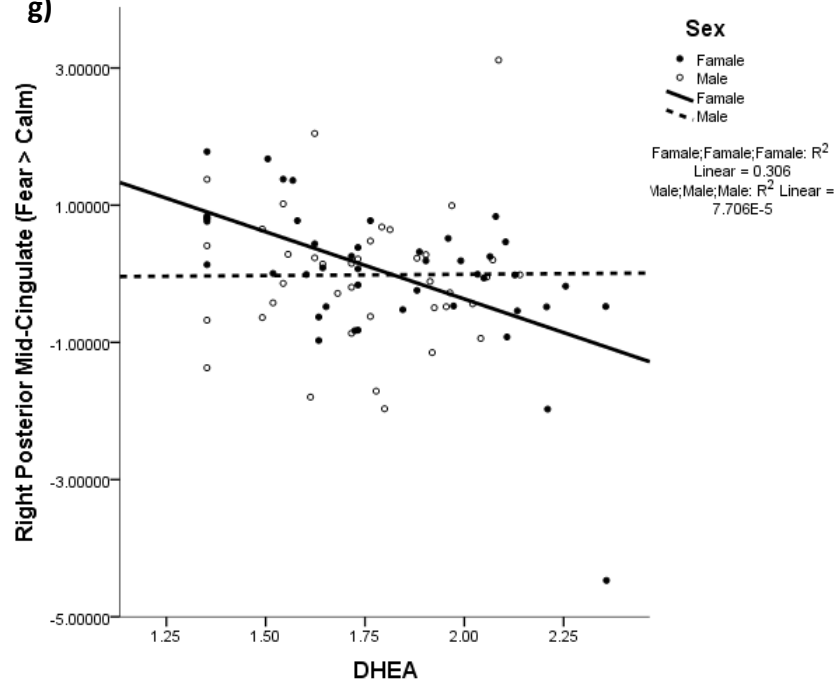

h)

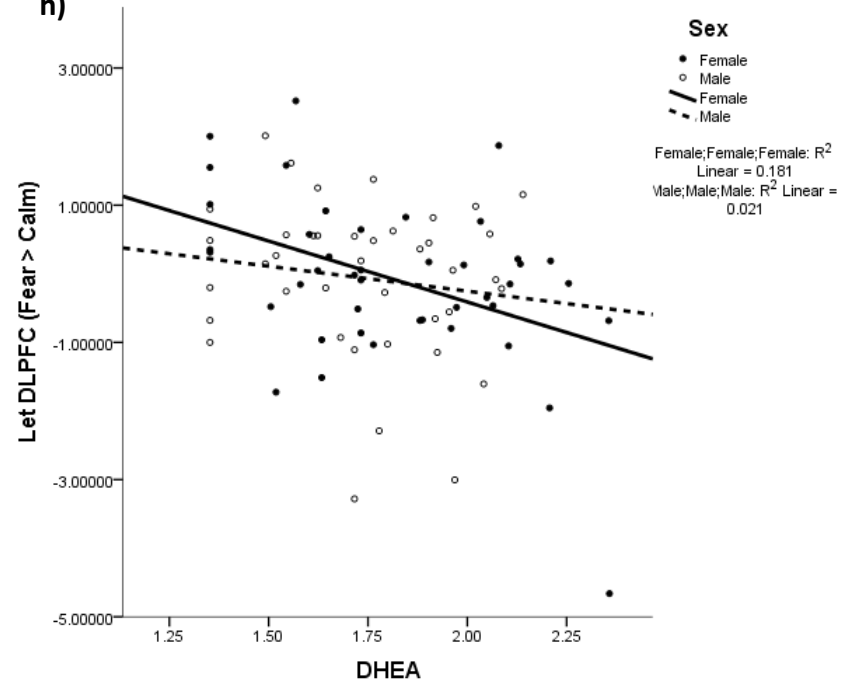

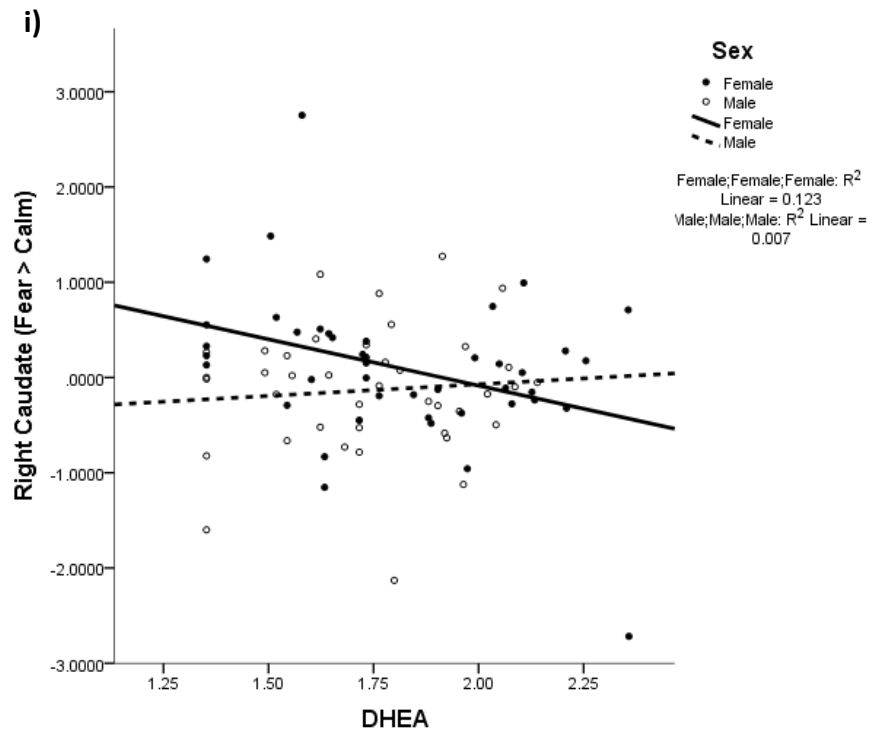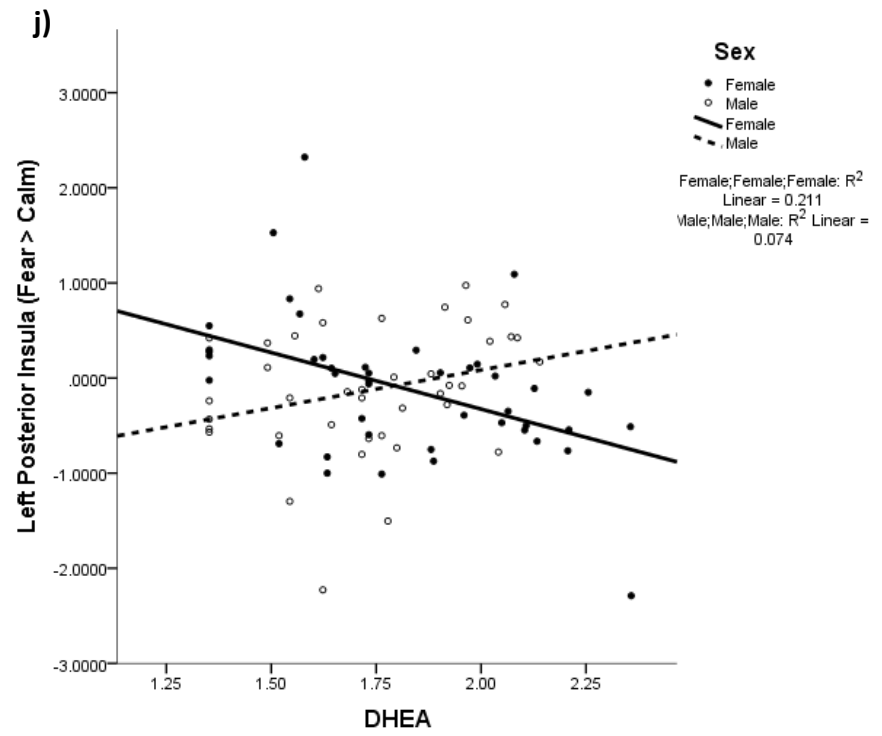

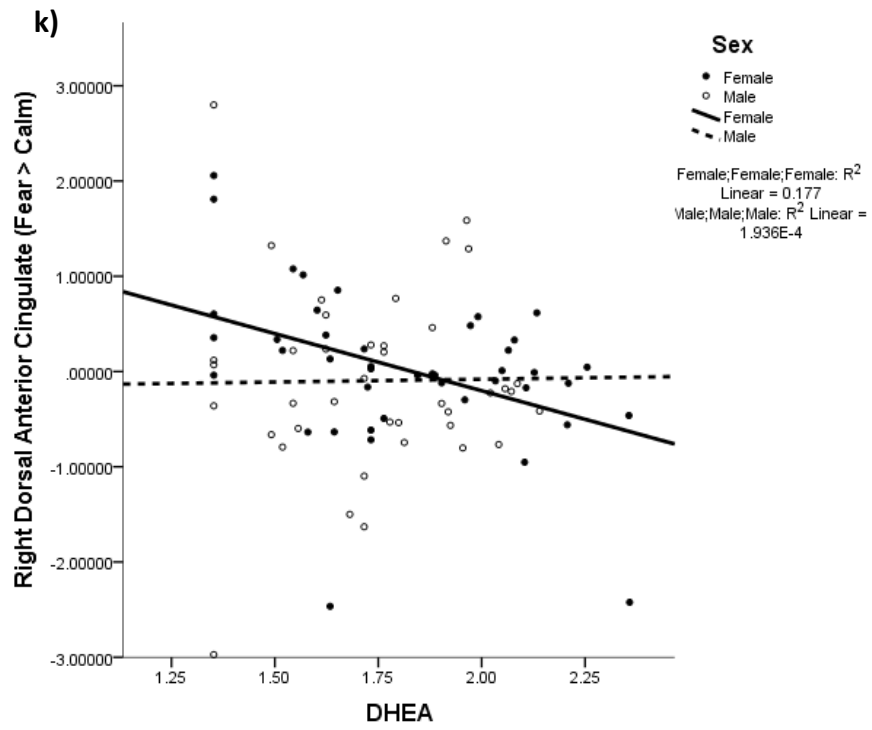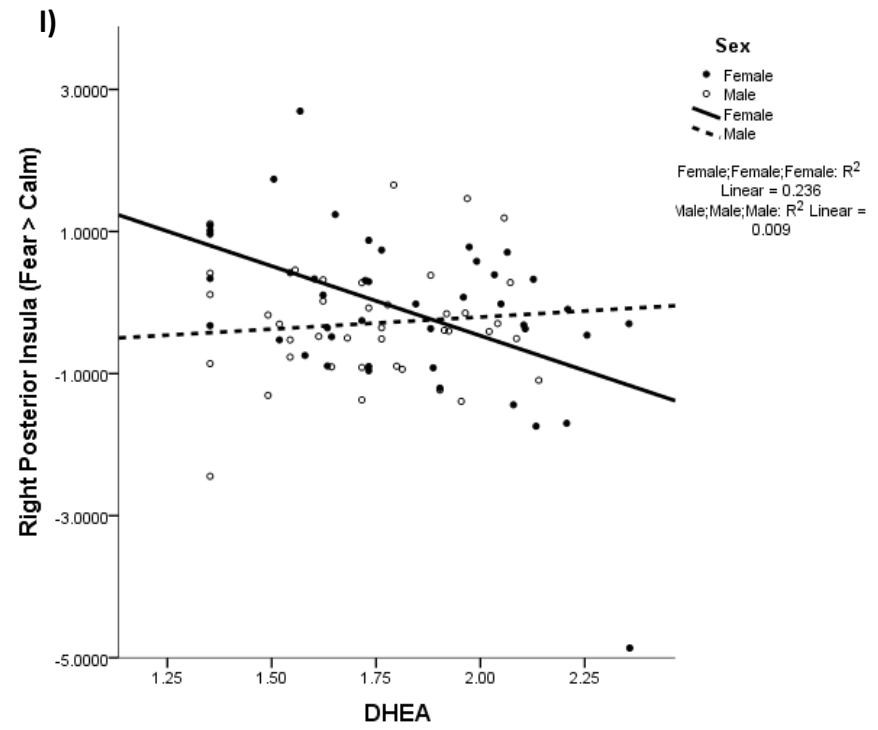

m)

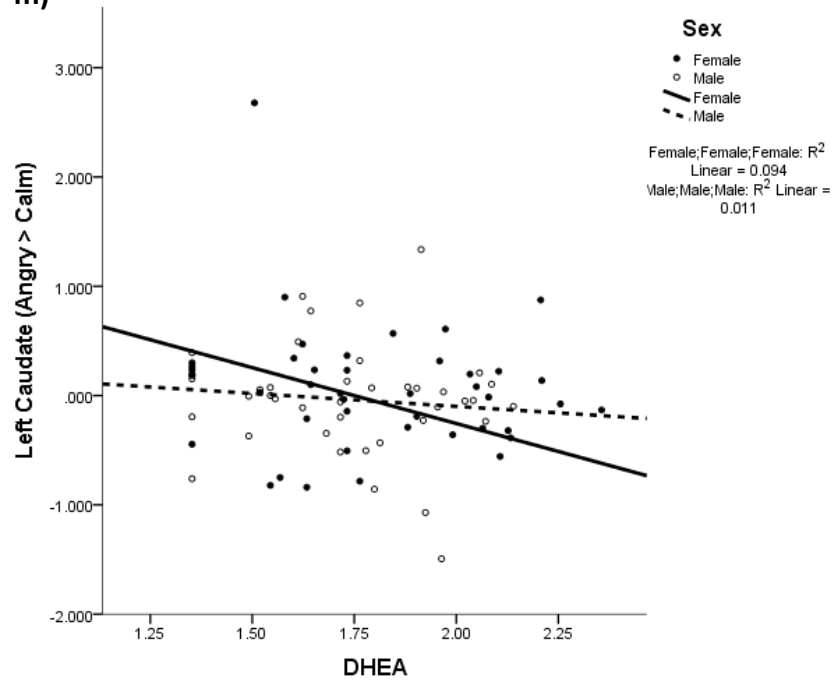

n)

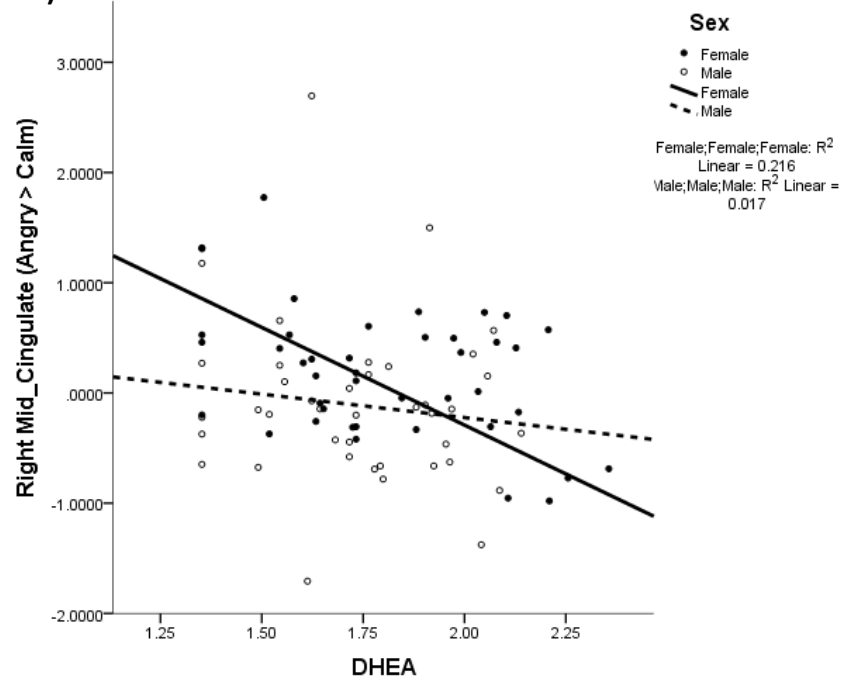



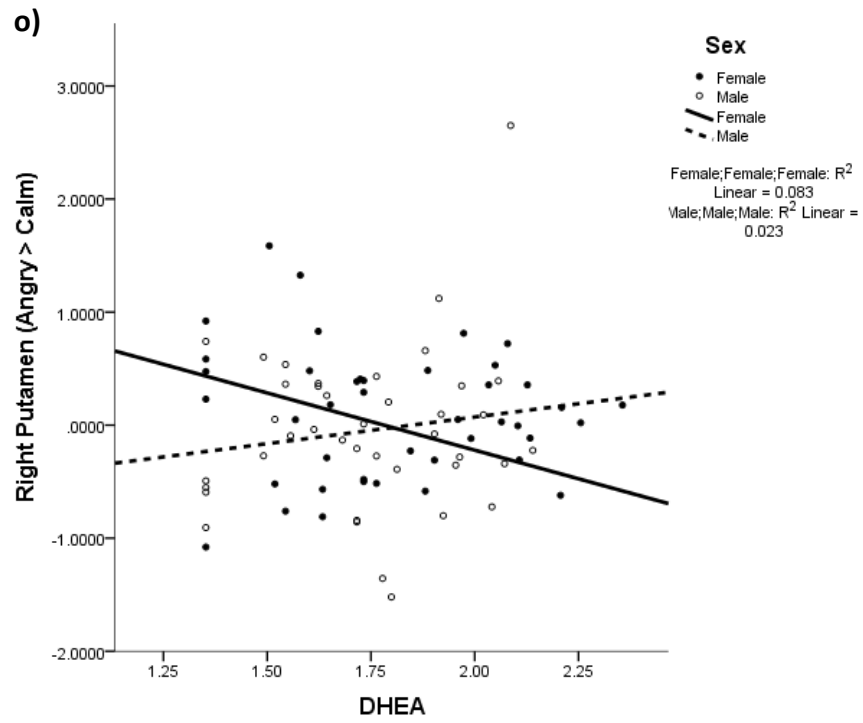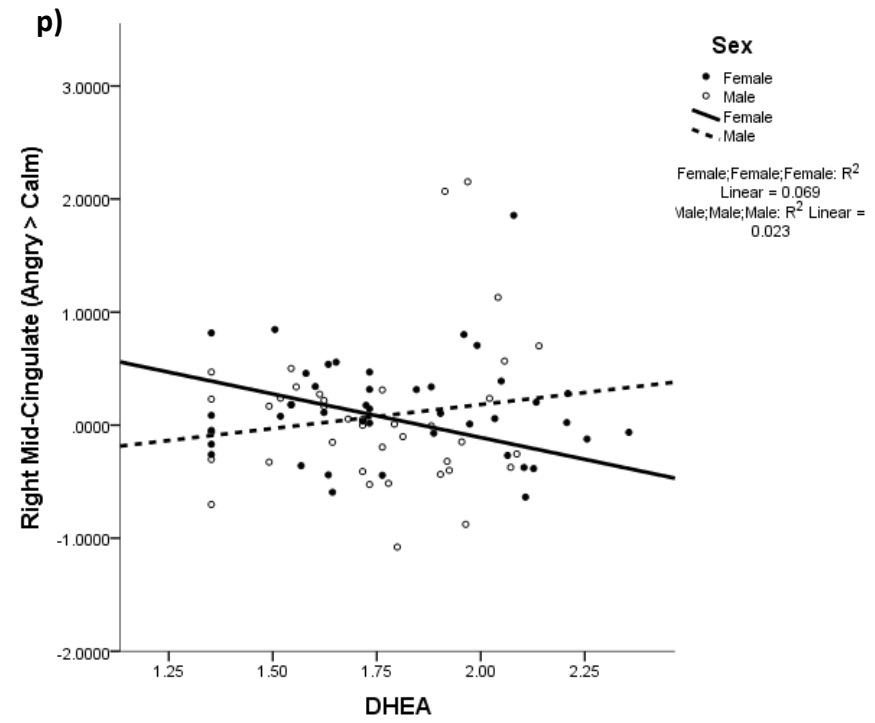

Supplementary Figure 1.
